# Supplementary material for: Experimental Proof of a Transformation Product Trap Effect with a Membrane Photocatalytic Process for VOC Removal
Source: MDPI journal article supplement (doi:10.3390/membranes12090900), 2022-09-19
Supplement: s1 [file s1]

## **Supplementary material**

### ***1. Analytical method for identification and quantification of transformation products on surface medium***

#### ***1.1 Quantitative HPLC/UV analysis of Aldehydes and ketones***

A fraction of the 4 samples of photocatalytic medium (200 mg) is extracted in 4 mL of a DNPH/acetonitrile solution at 0.34g/mL. The extract is then filtered for HPLC/UV analysis under the following conditions:

- Injection volume: 10 µL
- Column: Restek C18, 25cm, 4.6 mm, 5 µm
- Eluent flow rate: 1 mL/min
- Eluent: Water/acetonitrile (40/60)
- Analysis time: 20 minutes
- Column temperature: 30°C
- UV wavelength: 360 nm

Limits of detection (LOD) and limits of quantification (LOQ) for aldehydes and ketones identified on the medium surface are presented Table S1.

#### ***1.2 Qualitative analysis in GC/MS of other compounds***

Approximately 100 mg of catalysts are extracted into 4 mL of carbon disulfide. The extract is filtered and analyzed in GC/MS under the following conditions:

- Column: vf-624-ms, 60m, 0.32 mm, 1.8µm
- Column flow rate: 1.8 mL/min
- Injection temperature: 270°C
- Split ratio: 15
- Transfer line temperature: 200°C
- Source temperature: 230°C
- Acquisition parameters :  $30 < m/z < 550$

|                        | LOD               | LOQ    | LOD    | LOQ    | LOD<br>(µg/g)    | LOQ<br>(µg/g) |
|------------------------|-------------------|--------|--------|--------|------------------|---------------|
|                        | ng/mL of desorbat |        | ng     |        | µg/g of catalyst |               |
| <b>Formaldehyde</b>    | 0,0049            | 0,0163 | 0,0196 | 0,0652 | 0,0001           | 0,0003        |
| <b>Acetaldehyde</b>    | 0,0077            | 0,0256 | 0,0307 | 0,1024 | 0,0002           | 0,0005        |
| <b>Acrolein</b>        | 0,0093            | 0,0309 | 0,0371 | 0,1235 | 0,0002           | 0,0006        |
| <b>Acetone</b>         | 0,0106            | 0,0354 | 0,0425 | 0,1418 | 0,0002           | 0,0007        |
| <b>Propionaldehyde</b> | 0,0124            | 0,0414 | 0,0497 | 0,1657 | 0,0002           | 0,0008        |
| <b>Butanal</b>         | 0,0199            | 0,0663 | 0,0796 | 0,2654 | 0,0004           | 0,0013        |
| <b>Benzaldehyde</b>    | 0,0269            | 0,0897 | 0,1076 | 0,3587 | 0,0005           | 0,0018        |
| <b>Pentanal</b>        | 0,0418            | 0,1394 | 0,1673 | 0,5578 | 0,0008           | 0,0028        |
| <b>m-Tolualdehyde</b>  | 0,0361            | 0,1202 | 0,1442 | 0,4808 | 0,0007           | 0,0024        |

**Table S1 Limits of detection (LOD) and limits of quantification (LOQ) for aldehydes and ketones identified on the medium surface**

## **2. Modeling of the experimental module**

This section is dedicated to the modeling of the experimental system (figure S1) for an effluent composed of n=5 compounds: nitrogen, oxygen, toluene, water and carbon dioxide. The photocatalytic reaction is considered in the permeate compartment. The following assumptions are made:

- Retentate and permeate compartments are CSTRs;
- Constant permeability for each compound;
- Steady state of the various phenomena;
- Isothermal conditions of the studied system;
- Uniform thickness of the membrane;
- Constant pressure in each compartment of the module.

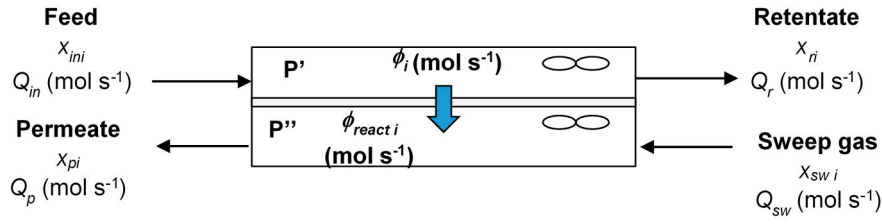

**Figure S1. Schematic representation of experimental module for molar balance**

$X_{ini}$ ,  $X_{ri}$ ,  $X_{pi}$  and  $X_{swi}$  correspond respectively to the mole fractions of compound  $i$  in feed, retentate and permeate compartments and in sweep gas flow.  $Q_{in}$ ,  $Q_r$  and  $Q_p$  are the molar fluxes in feed, on the retentate and permeate side ( $\text{mol s}^{-1}$ ), respectively,  $Q_{sw}$  is the sweep gas flux ( $\text{mol s}^{-1}$ ).  $\phi$  is the flux of compound  $i$  through the membrane ( $\text{mol s}^{-1}$ ) and  $\phi_{react i}$  is the reaction rate of compound  $i$  ( $\text{mol s}^{-1}$ ).

The different processes are modeled based on the molar balances and the expressions of the molar fluxes through the membrane.

### Photocatalytic Decomposition of Toluene

The production of highly oxidative  $\text{OH}^\bullet$  radicals by the light activation of  $\text{TiO}_2$  leads to the PCO of toluene according to the equation for a complete mineralization (S.1) [21–25]:

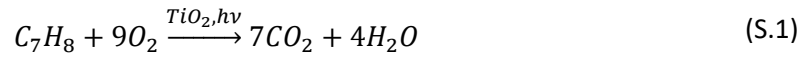

Before a complete mineralization of toluene, many intermediate compounds can appear during the photocatalytic process. The kinetic model applied for the PCO of toluene is often a Langmuir-Hinshelwood monomolecular model. In this paper, the light intensity absorbed by the catalyst and the mass of the photocatalytic medium are integrated [26,36]:

$$r = m I_{abs}^{n_i} \frac{kKC}{1+KC} = m I_{abs}^{n_i} \frac{kKx(\frac{P}{RT})}{1+Kx(\frac{P}{RT})} \quad (\text{S.2})$$

with  $r$  for the reaction rate ( $\text{mol s}^{-1}$ ),  $m$  for the mass of photocatalytic medium (g),  $I_{abs}$  for the absorbed light intensity by the photocatalytic medium ( $(\text{W m}^{-2})^{n_i}$ ,  $n_i$  for the order with respect to  $I_{abs}$ ,  $k$  for the apparent kinetic constant ( $\text{mol m}^{-3} (\text{W m}^{-2})^{-n_i} \text{g}^{-1} \text{s}^{-1}$ ),  $K$  for the adsorption constant ( $\text{m}^3 \text{mol}^{-1}$ ) and  $C$  for the concentration of toluene in the reactor ( $\text{mol m}^{-3}$ ). The reaction rate is also expressed with  $x$  as the mole fraction of toluene,  $R$  as the perfect gas constant ( $\text{J mol}^{-1} \text{K}^{-1}$ ),  $T$  as the temperature (K) and  $P$  as

the pressure (Pa). The kinetic study was conducted with a CSTR reactor. The light intensity absorbed by the photocatalytic medium was measured as a function of the thickness of the medium [29]. The light absorption model is:

$$I_{abs} = I_0(1 - e^{(-\alpha l)}) \quad (S.3)$$

with  $I_0$  for the irradiance received by the photocatalytic medium ( $W\ m^{-2}$ ),  $\alpha$  for the absorption coefficient ( $m^{-1}$ ) and  $l$  for the thickness of the photocatalytic medium (m).

#### Overall molar balance

$$Q_{in} = Q_r + Q_p - \sum_{i=1}^n \phi_{react\ i} \quad (S.4)$$

#### Overall molar balance for each compound i

$$Q_{in}x_{in\ i} = Q_r x_{ri} + Q_p x_{pi} - \phi_{react\ i} \quad (S.5)$$

And

$$\sum_{i=1}^n x_{ri} = 1 \quad (S.6)$$

#### Molar flux through the membrane for each compound / without a boundary layers or in the presence of a negligible boundary layers

$$\phi_i = \frac{SP_i}{z} [P' x_{ri} - P'' x_{pi}] \quad (S.7)$$

And

$$x_{p\ i} = \frac{\phi_i - \phi_{react\ i}}{\sum_{i=1}^n (\phi_i - \phi_{react\ i})} \quad (S.8)$$

$$\sum_{i=1}^n x_{pi} = 1 \quad (S.9)$$

$$\phi_{react\ i} = v_i r \quad (S.10)$$

$\phi_{react\ i}$  can be positive or negative depending on whether it is a compound that appears or disappears.  $S$  and  $z$  are the surface area ( $m^2$ ) and thickness (m) of the membrane, respectively.  $P_i$  is the membrane permeability of the compound  $i$  (Barrer or  $mol\ m^{-1}\ s^{-1}\ Pa^{-1}$ ).  $v_i$  is the stoichiometric coefficient of compound  $i$  from equation (S.1).  $v_i$  is positive for products and negative for reactants.

$\phi_i$  is expressed by taking into account the different resistances, in particular those of the laminar mass transfer boundary layers on either side of the membrane (Figure S2):

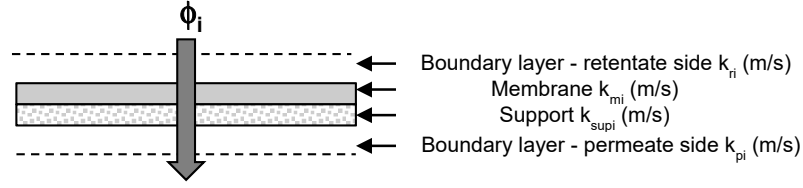

**Figure S2 Representation of the different layers of the membrane system and the corresponding resistances**

$$\phi_i = K_i S [C_{ri} - C_{pi}] = S \frac{[C_{ri} - C_{pi}]}{\frac{1}{k_{ri}} + \frac{1}{k_{mi}} + \frac{1}{k_{supi}} + \frac{1}{k_{pi}}} \quad (S.11)$$

$$\frac{1}{K_i} = \frac{1}{k_{ri}} + \frac{1}{k_{mi}} + \frac{1}{k_{supi}} + \frac{1}{k_{pi}} \quad (S.12)$$

$K_i$  ( $\text{m s}^{-1}$ ) represents the overall mass transfer resistance or overall mass transfer coefficient of compound  $i$  through the membrane.

In some cases, for example when the permeability of a compound is very high, a concentration gradient may appear at its boundary layer on the retentate side. This phenomenon, named concentration polarization, results in a decrease in the separation efficiency of the membrane for this compound. It is generally accepted that there is no concentration gradient on the permeate side. However, if a sweep gas is applied on the permeate side or, as in the present case, a reaction takes place in this compartment, it is likely that a concentration gradient will appear in the boundary layer on the permeate side.

### 3. Modeling of single photocatalytic CSTR

The modeling of a photocatalytic reactor operating in CSTR mode is represented by equation (S.10). This modeling is used to compare the toluene removal performance of this type of reactor with that of a hybrid module described in the previous section.

$$x_{r\_tol} = \frac{Q_{in} \times x_{in\_tol} - r}{Q_p} \quad (S.13)$$

With

$$r = m I_{abs}^{n_i} \frac{kKC}{1+KC} = m I_{abs}^{n_i} \frac{kKx(\frac{P}{RT})}{1+Kx(\frac{P}{RT})} \quad (S.14)$$

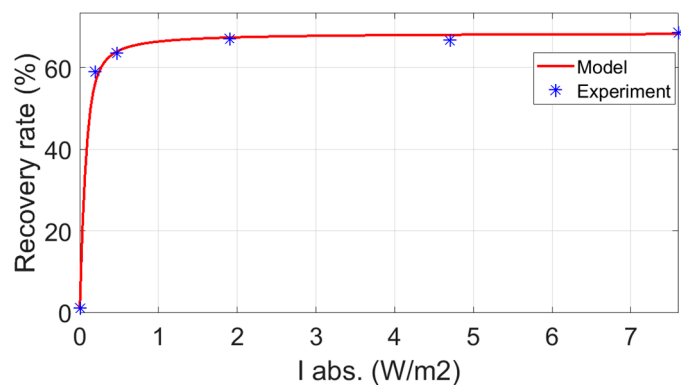

Figure S3. Toluene recovery ratio vs  $I_{abs}$  for PDMS membrane - catalyst  $m2$  -  $\psi = 0.98/1.3$

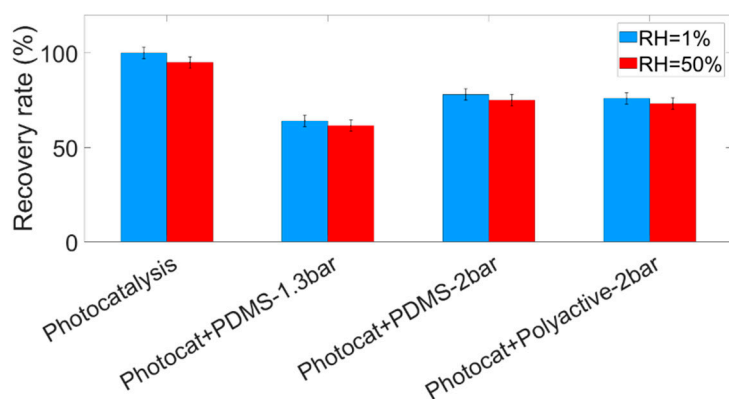

Figure S4. Toluene recovery ratio vs Relative Humidity (RH) -  $I_{abs} = 6.9 \text{ W m}^{-2}$  - PDMS membrane - catalyst  $m2$

| Membrane   | $K_{tol}$<br>( $\text{m s}^{-1}$ ) | $K_{N2}$<br>( $\text{m s}^{-1}$ ) | $K_{O2}$<br>( $\text{m s}^{-1}$ ) | $K_{CO2}$<br>( $\text{m s}^{-1}$ ) | $K_{H2O}$<br>( $\text{m s}^{-1}$ ) |
|------------|------------------------------------|-----------------------------------|-----------------------------------|------------------------------------|------------------------------------|
| PDMS       | $9 \times 10^{-4}$                 | $4.2 \times 10^{-6}$              | $8.4 \times 10^{-6}$              | $5.0 \times 10^{-5}$               | $5.8 \times 10^{-4}$               |
| PolyActive | $9.5 \times 10^{-4}$               | $3.0 \times 10^{-5}$              | $8.1 \times 10^{-5}$              | -                                  | -                                  |

Table S2. Overall mass transfer coefficients of compounds for the PDMS and PolyActive membranes
